# Supplementary material
Source: HighWire-hosted journal article supplement (https://www.cmajopen.ca/highwire/filestream/88999/field_highwire_adjunct_files/0/open-2022-0063-at-1.pdf)
Supplement: open-2022-0063-at-1.pdf [file open-2022-0063-at-1.pdf]

Appendix 1, as supplied by the authors. Appendix to: Lexchin J. Time to potential for listing of new drugs on public and private formularies in Canada: a cross-sectional study. CMAJ Open 2022. doi:10.9778/cmajo.20220063. Copyright © 2022 The Author(s) or their employer(s). To receive this resource in an accessible format, please contact us at [cmajgroup@cmaj.ca](mailto:cmajgroup@cmaj.ca).

**Supplementary file 1: data extracted from databases**

| Generic name                | Date New Drug Submission filed | Date of Notice of Compliance (market approval) | Date of marketing | Type of decision                                   | Date of CADTH decision | CADTH submission dates | Additional therapeutic value (best rating from HDAP) |          |                | Date of pCPA / pCPA decision | pCPA decision            |
|-----------------------------|--------------------------------|------------------------------------------------|-------------------|----------------------------------------------------|------------------------|------------------------|------------------------------------------------------|----------|----------------|------------------------------|--------------------------|
|                             |                                |                                                |                   |                                                    |                        |                        | Major                                                | Moderate | Little to none |                              |                          |
| Brentuximab                 | 2012-04-11                     | 2013-02-01                                     | 2013-02-19        | Reimburse with clinical criteria and/or conditions | 2013-08-29             | 2013-03-14             |                                                      |          | 1              | <a href="#">2014-01-31</a>   | Positive                 |
| Riociguat                   | 2013-02-25                     | 2013-09-19                                     | 2013-09-25        | List with criteria/condition                       | 2014-07-17             | 2013-09-30             |                                                      |          | 1              | <a href="#">2015-01-23</a>   | Positive                 |
| Lixisenatide                | 2016-04-26                     | 2017-05-25                                     | 2017-09-12        | Reimburse with clinical criteria and/or conditions | 2017-11-23             | 2017-05-29             |                                                      |          | 1              | <a href="#">2019-11-21</a>   | Positive                 |
| Erenumab                    | 2017-08-18                     | 2018-08-01                                     | 2018-12-04        | Reimburse with clinical criteria and/or conditions | 2020-07-22             | 2019-05-02             |                                                      |          | 1              | <a href="#">2021-12-13</a>   | Negative                 |
| Fremanezumab                | 2019-05-01                     | 2020-04-09                                     | 2020-08-04        | Reimburse with clinical criteria and/or conditions | 2021-03-24             | 2020-06-03             |                                                      |          | 1              | <a href="#">2021-12-03</a>   | Positive                 |
| Netupitant, palonestron     | 2016-10-13                     | 2017-09-28                                     | 2017-11-20        | Reimburse with clinical criteria and/or conditions | 2018-06-20             | 2017-12-08             |                                                      |          |                | <a href="#">2019-04-24</a>   | Positive                 |
| Alectinib                   | 2015-11-12                     | 2016-09-29                                     | 2016-10-14        | Reimburse with clinical criteria and/or conditions | 2017-05-04             | 2016-10-03             |                                                      |          | 1              | <a href="#">2018-12-11</a>   | Positive                 |
| Palonosetron                | 2011-03-31                     | 2012-03-14                                     | 2012-06-19        | Do not list                                        | 2013-04-24             | 2012-10-05             |                                                      | 1        |                | <a href="#">2013-08-21</a>   | Negotiations not pursued |
| Brigatinib                  | 2017-10-24                     | 2018-07-26                                     | 2018-08-31        | Do not reimburse                                   | 2019-08-01             | 2018-12-05             |                                                      |          |                | <a href="#">2021-12-16</a>   | Positive                 |
| Umeclidinium and vilanterol | 2013-01-10                     | 2013-12-23                                     | 2014-03-14        | List with criteria/condition                       | 2015-01-15             | 2014-02-26             |                                                      |          | 1              | <a href="#">2015-05-01</a>   | Positive                 |
| Eslicarbazepine             | 2013-06-12                     | 2014-07-08                                     | 2014-08-07        | List with criteria/condition                       | 2015-04-16             | 2014-08-15             |                                                      |          | 1              | <a href="#">2015-09-08</a>   | Positive                 |
| Ofatumumab                  | 2011-01-21                     | 2012-03-09                                     | 2012-08-13        | Do not reimburse                                   | 2015-01-29             | 2014-04-14             |                                                      |          | 1              | <a href="#">2015-02-27</a>   | Negotiations not pursued |
| Teriflunomide               | 2012-11-29                     | 2013-11-14                                     | 2013-11-15        | Do not list at the submitted price                 | 2014-06-18             | 2013-08-28             |                                                      |          | 1              | <a href="#">2014-09-26</a>   | Positive                 |
| Rufinamide                  | 2010-07-06                     | 2011-06-22                                     | 2011-10-20        | List with clinical criteria and/or conditions      | 2012-03-15             | 2011-09-20             |                                                      |          | 1              |                              |                          |

|                                                                       |            |            |            |                                                    |            |            |   |   |                            |                          |
|-----------------------------------------------------------------------|------------|------------|------------|----------------------------------------------------|------------|------------|---|---|----------------------------|--------------------------|
| Avelumab                                                              | 2017-03-23 | 2017-12-18 | 2017-12-18 | Reimburse with clinical criteria and/or conditions | 2018-03-21 | 2020-09-18 |   | 1 | <a href="#">2019-01-17</a> | Positive                 |
| Belimumab                                                             | 2010-07-15 | 2011-07-06 | 2011-08-24 | Do not list                                        | 2012-04-25 | 2011-09-19 |   | 1 | <a href="#">2014-01-31</a> | Negotiations not pursued |
| brolocizumab                                                          | 2019-03-27 | 2020-03-12 | 2020-05-15 | Reimburse with clinical criteria and/or conditions | 2020-05-21 | 2019-09-26 |   | 1 | <a href="#">2021-08-31</a> | Positive                 |
| Inotuzumab ozogamicin                                                 | 2017-03-30 | 2018-03-15 | 2018-05-03 | Reimburse with clinical criteria and/or conditions | 2018-07-06 | 2017-11-13 |   | 1 | <a href="#">2019-02-06</a> | Positive                 |
| Bictegravir sodium, emtricitabine, tenofovir alafenamide hemifumarate | 2017-07-26 | 2018-07-10 | 2018-08-08 | Reimburse with clinical criteria and/or conditions | 2018-10-25 | 2018-04-30 |   | 1 | <a href="#">2019-06-14</a> | Positive                 |
| Blinatumomab                                                          | 2015-01-30 | 2015-12-22 | 2016-03-17 | Reimburse with clinical criteria and/or conditions | 2016-04-01 | 2015-08-24 |   | 1 | <a href="#">2017-01-09</a> | Positive                 |
| Bosutinib                                                             | 2011-12-20 | 2014-03-14 | 2014-04-24 | Reimburse with clinical criteria and/or conditions | 2015-04-21 | 2014-05-30 |   | 1 | <a href="#">2015-11-09</a> | Positive                 |
| Fluticasone and vilatnerol                                            | 2012-07-20 | 2013-07-03 | 2013-11-29 | List with criteria/condition                       | 2014-08-18 | 2013-10-29 |   | 1 | <a href="#">2015-02-03</a> | Positive                 |
| Ticagrelor                                                            | 2010-02-08 | 2011-05-30 | 2011-06-01 | Do not list                                        | 2011-12-16 | 2011-06-01 |   | 1 | <a href="#">2012-09-12</a> | Positive                 |
| Cerliponase Alfa                                                      | 2018-05-25 | 2018-12-19 | 2019-03-18 | Reimburse with clinical criteria and/or conditions | 2019-05-23 | 2018-07-31 | 1 |   | <a href="#">2020-01-22</a> | Positive                 |
| Brivaracetam                                                          | 2015-03-30 | 2016-03-09 | 2016-05-02 | Reimburse with clinical criteria and/or conditions | 2017-01-25 | 2016-04-19 |   | 1 | <a href="#">2018-10-22</a> | Positive                 |
| Exenatide                                                             | 2009-04-06 | 2011-01-13 | 2011-06-01 | Do not list                                        | 2012-07-19 | 2011-08-23 |   | 1 | <a href="#">2013-06-13</a> | Negative                 |
| Nebivolol                                                             | 2011-12-23 | 2012-12-21 | 2013-04-02 | Do not list at the submitted price                 | 2013-07-18 | 2013-02-04 |   | 1 | <a href="#">2013-08-22</a> | Negotiations not pursued |
| cabotegravir, rilpivirine                                             | 2019-04-29 | 2020-03-18 | 2020-09-21 | Reimburse with clinical criteria and/or conditions | 2020-07-22 | 2019-08-19 |   |   | <a href="#">2021-09-07</a> | Positive                 |
| caplacizumab                                                          | 2019-07-22 | 2020-02-28 | 2020-09-04 | Do not reimburse                                   | 2020-08-26 | 2019-09-13 |   |   | <a href="#">2020-10-23</a> | Negotiations not pursued |

|                         |            |            |            |                                                    |            |            |   |                            |                          |
|-------------------------|------------|------------|------------|----------------------------------------------------|------------|------------|---|----------------------------|--------------------------|
| acalabrutinib           | 2018-03-15 | 2019-08-23 | 2019-10-02 | Reimburse with clinical criteria and/or conditions | 2020-11-17 |            | 1 | <a href="#">2021-10-05</a> | Positive                 |
| Vandetanib              | 2011-01-27 | 2012-01-12 | 2012-02-23 | Reimburse with clinical criteria and/or conditions | 2017-03-30 | 2016-08-15 | 1 | <a href="#">2018-06-01</a> | Positive                 |
| Eliglustat              | 2015-03-19 | 2017-04-21 | 2017-07-26 | Reimburse with clinical criteria and/or conditions | 2017-07-26 | 2017-01-20 | 1 | <a href="#">2018-05-31</a> | Positive                 |
| Reslizumab              | 2015-07-03 | 2016-07-20 | 2016-12-19 | Reimburse with clinical criteria and/or conditions | 2017-03-22 | 2016-08-04 |   | <a href="#">2018-11-15</a> | Negative                 |
| Linacotide              | 2012-12-14 | 2013-12-02 | 2014-04-29 | Do not list                                        | 2015-09-23 | 2014-12-17 | 1 | <a href="#">2015-11-02</a> | Negotiations not pursued |
| Ranolazine              | 2020-05-27 | 2020-12-31 | 2021-05-03 | Do not reimburse                                   | 2021-05-27 | 2020-08-17 | 1 |                            | Under consideration      |
| Secukinumab             | 2013-12-17 | 2015-02-27 | 2015-09-25 | List with criteria/condition                       | 2015-10-28 | 2014-12-08 | 1 | <a href="#">2016-06-08</a> | Positive                 |
| Cobimetinib             | 2015-03-12 | 2016-02-22 | 2016-04-06 | Reimburse with clinical criteria and/or conditions | 2016-06-30 | 2015-12-11 | 1 | <a href="#">2017-05-11</a> | Positive                 |
| Isavuconazonium sulfate | 2017-10-26 | 2018-12-19 | 2019-05-02 | Reimburse with clinical criteria and/or conditions | 2019-05-15 | 2018-11-02 |   | <a href="#">2019-11-25</a> | Positive                 |
| Burosumab               | 2018-05-16 | 2018-12-05 | 2019-01-28 | Reimburse with clinical criteria and/or conditions | 2020-05-27 | 2019-07-23 |   | <a href="#">2021-09-10</a> | Positive                 |
| Ramucirumab             | 2014-07-28 | 2015-07-16 | 2015-09-10 | Reimburse with clinical criteria and/or conditions | 2015-10-29 | 2015-04-15 | 1 | <a href="#">2016-10-27</a> | Positive                 |
| Daclatasvir             | 2014-05-16 | 2015-08-13 | 2015-09-08 | List with clinical criteria and/or conditions      | 2015-09-21 | 2015-02-13 | 1 | <a href="#">2017-02-17</a> | Positive                 |
| Daratumumab             | 2015-09-14 | 2016-06-29 | 2016-07-12 | Do not reimburse                                   | 2016-12-01 | 2016-04-21 | 1 | <a href="#">2018-11-14</a> | Positive                 |
| Glasdegib               | 2019-03-15 | 2020-04-28 | 2020-08-10 | Do not reimburse                                   | 2021-01-08 | 2020-05-06 |   | <a href="#">2021-02-23</a> | Negotiations not pursued |
| Stiripentol             | 2010-10-08 | 2012-12-21 | 2013-05-01 | List with criteria/condition                       | 2014-10-16 | 2013-10-30 | 1 | <a href="#">2015-05-11</a> | Positive                 |
| Fidaxomicin             | 2011-11-02 | 2012-06-07 | 2012-06-21 | Do not list at the submitted price                 | 2012-12-19 | 2012-07-10 | 1 | <a href="#">2013-11-13</a> | Positive                 |

|                            |            |            |                            |                                                    |            |            |   |   |                            |                                     |
|----------------------------|------------|------------|----------------------------|----------------------------------------------------|------------|------------|---|---|----------------------------|-------------------------------------|
| Dupilumab                  | 2016-12-16 | 2017-11-30 | 2018-02-06                 | Do not reimburse                                   | 2018-06-27 | 2017-10-27 |   | 1 | <a href="#">2019-09-17</a> | Positive                            |
| Azelastine and fluticasone | 2013-12-04 | 2014-10-23 | 2015-03-31                 | Do not list                                        | 2015-06-17 | 2014-12-09 |   | 1 | <a href="#">2015-07-24</a> | Negotiations not pursued            |
| Azilsartan                 | 2011-03-28 | 2012-03-08 | 2012-11-08                 | Do not list at the submitted price                 | 2013-10-17 | 2013-03-08 |   | 1 | <a href="#">2013-11-12</a> | Negotiations not pursued            |
| Rilpivirine                | 2010-08-13 | 2011-07-21 | 2011-08-31                 | List                                               | 2012-02-15 | 2011-07-29 |   | 1 |                            |                                     |
| Doxycycline                | 2010-12-02 | 2011-11-14 | <a href="#">2012-11-29</a> | Do not list                                        | 2013-03-27 | 2012-04-27 |   |   |                            |                                     |
| Tesamorelin                | 2011-06-17 | 2014-04-29 | 2015-06-23                 | Do not reimburse                                   | 2016-08-24 | 2016-03-02 |   | 1 | <a href="#">2016-10-14</a> | Negotiations not pursued            |
| Taliglucerase Alfa         | 2013-06-18 | 2014-05-29 | 2014-09-08                 | Do not list                                        | 2015-10-28 | 2014-08-15 |   | 1 | <a href="#">2018-05-17</a> | Positive                            |
| Apixaban                   | 2010-10-05 | 2011-12-16 | 2012-02-01                 | List with clinical criteria and/or conditions      | 2012-06-14 | 2011-12-20 |   | 1 | <a href="#">2013-10-10</a> | Positive                            |
| Satralizumab               | 2019-11-18 | 2020-06-01 | 2020-08-26                 | Reimburse with clinical criteria and/or conditions | 2021-04-21 | 2020-10-22 |   |   |                            | Active negotiation                  |
| Sacubitril, Valsartan      | 2015-03-06 | 2015-10-02 | 2015-11-13                 | List with clinical criteria and/or conditions      | 2016-03-18 | 2015-09-18 | 1 |   | <a href="#">2017-03-06</a> | Positive                            |
| Vedolizumab                | 2013-11-21 | 2015-01-29 | 2015-04-21                 | List with clinical criteria and/or conditions      | 2015-10-28 | 2015-02-20 |   | 1 | <a href="#">2017-03-03</a> | Positive                            |
| Sofosbuvir + Velpatasvir   | 2015-12-14 | 2016-07-11 | 2016-08-02                 | Reimburse with clinical criteria and/or conditions | 2016-10-26 | 2016-04-22 |   | 1 | <a href="#">2017-02-17</a> | Positive                            |
| Vismodegib                 | 2012-04-02 | 2013-07-12 | 2013-08-09                 | Reimburse with clinical criteria and/or conditions | 2014-01-10 | 2013-06-14 |   | 1 | <a href="#">2014-04-01</a> | Positive                            |
| Apalutamide                | 2017-12-07 | 2018-07-03 | 2018-07-27                 | Reimburse with clinical criteria and/or conditions | 2018-11-01 | 2018-04-16 |   | 1 | <a href="#">2019-07-09</a> | Positive                            |
| Pirfenidone                | 2012-03-02 | 2012-10-01 | 2013-01-08                 | Do not list                                        | 2013-04-18 | 2012-10-05 |   | 1 | <a href="#">2014-08-15</a> | Positive                            |
| Crisaborole                | 2017-06-23 | 2018-06-07 | 2018-08-29                 | Do not reimburse                                   | 2019-03-27 | 2018-05-25 |   |   | <a href="#">2019-04-16</a> | Negotiations not pursued            |
| romosozumab                | 2016-08-18 | 2019-06-17 | 2019-08-12                 | Reimburse with clinical criteria and/or conditions | 2021-11-11 | 2021-02-01 |   | 1 |                            | Under consideration for negotiation |
| Aflibercept                | 2011-08-17 | 2013-11-08 | 2013-12-23                 | List with criteria/condition                       | 2014-10-20 | 2013-11-18 |   | 1 | <a href="#">2015-03-27</a> | Positive                            |

|                                                                                            |            |            |            |                                                    |            |            |   |   |                            |                          |
|--------------------------------------------------------------------------------------------|------------|------------|------------|----------------------------------------------------|------------|------------|---|---|----------------------------|--------------------------|
| Fampridine                                                                                 | 2009-12-07 | 2012-02-10 | 2012-02-24 | Do not list                                        | 2012-11-28 | 2012-04-16 |   | 1 | <a href="#">2014-01-31</a> | Negotiations not pursued |
| Benralizumab                                                                               | 2017-03-21 | 2018-02-22 | 2018-03-28 | Reimburse with clinical criteria and/or conditions | 2018-08-21 | 2018-02-23 |   | 1 | <a href="#">2019-05-03</a> | Positive                 |
| Deferiprone                                                                                | 2013-03-07 | 2015-02-13 | 2016-07-28 | List with clinical criteria and/or conditions      | 2016-03-18 | 2015-09-24 |   | 1 | <a href="#">2016-09-07</a> | Positive                 |
| Ulipristal                                                                                 | 2012-06-29 | 2013-06-24 | 2013-07-04 | List with criteria/condition                       | 2013-11-15 | 2013-04-17 |   | 1 | <a href="#">2015-09-18</a> | Positive                 |
| Icatibant                                                                                  | 2013-03-05 | 2014-06-04 | 2014-07-14 | List with clinical criteria and/or conditions      | 2014-12-19 | 2014-03-04 |   | 1 | <a href="#">2015-08-28</a> | Positive                 |
| Pralatrexate                                                                               | 2017-07-18 | 2018-10-26 | 2019-01-15 | Reimburse with clinical criteria and/or conditions | 2019-04-04 | 2018-06-01 |   |   | <a href="#">2020-01-10</a> | Positive                 |
| Dapagliflozin                                                                              | 2012-12-07 | 2014-12-12 | 2015-01-16 | List with clinical criteria and/or conditions      | 2015-11-20 | 2015-04-30 |   | 1 | <a href="#">2016-10-03</a> | Positive                 |
| Perampanel                                                                                 | 2012-02-29 | 2013-04-04 | 2013-06-19 | List with criteria/condition                       | 2013-10-17 | 2013-03-08 |   | 1 | <a href="#">2019-07-02</a> | Positive                 |
| Migalastat                                                                                 | 2016-07-15 | 2017-09-05 | 2018-01-15 | Reimburse with clinical criteria and/or conditions | 2018-01-24 | 2017-06-09 |   | 1 | <a href="#">2018-08-28</a> | Positive                 |
| Simeprevir                                                                                 | 2013-04-15 | 2013-11-18 | 2013-11-25 | List with criteria/condition                       | 2014-06-18 | 2013-08-22 |   | 1 | <a href="#">2014-08-20</a> | Positive                 |
| Obinutuzumab                                                                               | 2013-10-02 | 2014-11-25 | 2014-11-28 | Reimburse                                          | 2015-01-27 | 2014-08-11 | 1 |   | <a href="#">2015-05-15</a> | Positive                 |
| Elvitegravir,<br>Cobicistat,<br>Emtricitabine,<br>Tenofovir<br>Alafenamide<br>Hemifumarate | 2015-01-19 | 2015-11-27 | 2016-02-03 | List                                               | 2016-03-18 | 2015-09-24 |   | 1 | <a href="#">2017-03-13</a> | Positive                 |
| Fingolimod                                                                                 | 2010-03-23 | 2011-03-09 | 2011-03-28 | List with clinical criteria and/or conditions      | 2011-11-16 | 2011-05-10 |   | 1 | <a href="#">2013-03-04</a> | Positive                 |
| Afatinib                                                                                   | 2012-09-12 | 2013-11-01 | 2014-01-17 | Reimburse                                          | 2014-05-02 | 2013-06-07 |   | 1 | <a href="#">2014-07-03</a> | Positive                 |
| Eribulin                                                                                   | 2010-12-31 | 2011-12-14 | 2012-03-19 | Reimburse with clinical criteria and/or conditions | 2012-08-02 | 2012-02-09 |   | 1 | <a href="#">2013-07-02</a> | Positive                 |

|                                                |            |            |            |                                                    |            |            |   |   |                            |                                     |
|------------------------------------------------|------------|------------|------------|----------------------------------------------------|------------|------------|---|---|----------------------------|-------------------------------------|
| Ledipasvir and sofosbuvir                      | 2014-03-20 | 2014-10-15 | 2014-10-16 | List with criteria/condition                       | 2015-03-18 | 2014-09-15 |   | 1 | <a href="#">2015-02-05</a> | Positive                            |
| Emicizumab                                     | 2018-01-09 | 2018-08-02 | 2018-10-19 | Reimburse with clinical criteria and/or conditions | 2020-12-21 | 2020-06-30 | 1 |   |                            |                                     |
| Ritonavir, paritaprevir, ombitasvir, dasabuvir | 2014-05-14 | 2014-12-22 | 2015-01-06 | List with clinical criteria and/or conditions      | 2015-06-18 | 2014-12-03 |   | 1 | <a href="#">2015-06-16</a> | Positive                            |
| Ponatinib                                      | 2013-05-23 | 2015-04-02 | 2015-08-21 | Reimburse with clinical criteria and/or conditions | 2015-10-01 | 2015-03-13 |   | 1 | <a href="#">2016-07-04</a> | Positive                            |
| Enasidenib mesylate                            | 2018-06-15 | 2019-02-06 | 2019-02-27 | Do not reimburse                                   | 2019-10-31 | 2019-04-05 |   |   |                            | Under consideration for negotiation |
| Ibrutinib                                      | 2014-04-17 | 2014-11-17 | 2014-11-19 | Reimburse with clinical criteria and/or conditions | 2015-03-05 | 2014-08-15 | 1 |   | <a href="#">2015-06-02</a> | Positive                            |
| Durvalumab                                     | 2017-02-16 | 2017-11-03 | 2017-11-20 | Reimburse with clinical criteria and/or conditions | 2019-05-03 | 2018-09-21 |   | 1 | <a href="#">2019-08-26</a> | Positive                            |
| Telaprevir                                     | 2011-01-14 | 2011-08-16 | 2011-10-03 | List with clinical criteria and/or conditions      | 2012-02-15 | 2011-08-23 |   | 1 |                            |                                     |
| Mecasermin                                     | 2020-01-09 | 2020-12-17 | 2021-03-01 | Reimburse with clinical criteria and/or conditions | 2022-01-21 | 2021-06-14 |   |   |                            | Under consideration for negotiation |
| Axitinib                                       | 2011-06-28 | 2012-07-12 | 2012-08-17 | Reimburse                                          | 2013-03-07 | 2012-08-16 |   | 1 | <a href="#">2013-11-22</a> | Positive                            |
| Fedratinib                                     | 2019-07-19 | 2020-07-27 | 2021-05-20 | Reimburse with clinical criteria and/or conditions | 2021-06-21 | 2020-11-05 |   |   |                            | Active negotiation                  |
| Romidepsin                                     | 2011-12-22 | 2013-10-16 | 2014-02-05 | Reimburse with clinical criteria and/or conditions | 2015-05-19 | 2014-12-01 |   | 1 | <a href="#">2015-09-16</a> | Positive                            |
| Ruxolitinib                                    | 2011-11-29 | 2012-06-19 | 2012-07-19 | Reimburse with clinical criteria and/or conditions | 2013-01-14 | 2012-06-25 |   | 1 | <a href="#">2013-09-03</a> | Positive                            |
| Empagliflozin                                  | 2013-04-17 | 2015-07-23 | 2015-08-11 | List with clinical criteria and/or conditions      | 2015-10-15 | 2015-04-23 |   | 1 | <a href="#">2016-04-13</a> | Positive                            |

|                       |            |            |            |                                                    |            |            |   |            |            |                          |
|-----------------------|------------|------------|------------|----------------------------------------------------|------------|------------|---|------------|------------|--------------------------|
| Ocriplasmin           | 2012-12-24 | 2013-08-13 | 2013-11-20 | List with criteria/condition                       | 2013-12-20 | 2013-06-06 | 1 | 2014-10-10 | Positive   |                          |
| Efinaconazole         | 2012-10-19 | 2013-10-02 | 2014-07-21 | Do not reimburse                                   | 2019-05-23 | 2018-08-02 |   | 1          | 2019-06-19 | Negotiations not pursued |
| Lomitapide            | 2012-11-21 | 2014-02-04 | 2014-05-06 | Do not list                                        | 2015-04-17 | 2014-07-08 |   | 1          | 2015-05-26 | Negotiations not pursued |
| Trastuzumab emtansine | 2013-02-08 | 2013-09-11 | 2013-10-09 | Reimburse with clinical criteria and/or conditions | 2014-01-10 | 2013-03-15 |   | 1          | 2014-03-31 | Positive                 |
| Ivacaftor             | 2012-04-30 | 2012-11-26 | 2012-11-27 | List with criteria/condition                       | 2013-03-22 | 2012-09-27 | 1 |            | 2014-06-16 | Positive                 |
| Sebelipase Alfa       | 2017-03-23 | 2017-12-15 | 2018-04-05 | Reimburse with clinical criteria and/or conditions | 2018-09-26 | 2017-11-02 | 1 |            | 2020-10-21 | Positive                 |
| Sarilumab             | 2016-01-29 | 2017-01-12 | 2017-03-29 | Reimburse with clinical criteria and/or conditions | 2017-04-18 | 2016-10-12 |   | 1          | 2019-02-26 | Positive                 |
| Pembrolizumab         | 2014-06-23 | 2015-05-19 | 2015-06-01 | Reimburse with clinical criteria and/or conditions | 2015-11-16 | 2015-04-16 |   | 1          | 2016-02-10 | Positive                 |
| Ribociclib            | 2017-03-17 | 2018-03-02 | 2018-04-27 | Reimburse with clinical criteria and/or conditions | 2018-04-18 | 2017-10-17 |   | 1          | 2019-04-26 | Positive                 |
| Carfilzomib           | 2015-05-19 | 2016-01-15 | 2016-02-11 | Reimburse with clinical criteria and/or conditions | 2017-03-30 | 2016-09-09 |   | 1          | 2017-12-08 | Positive                 |
| Ivabradine            | 2013-08-23 | 2016-12-23 | 2017-03-17 | Reimburse with clinical criteria and/or conditions | 2017-05-24 | 2016-11-08 |   | 1          | 2018-08-22 | Positive                 |
| Olaratumab            | 2017-03-06 | 2017-11-23 | 2017-12-22 | Reimburse with clinical criteria and/or conditions | 2018-04-18 | 2017-10-26 |   | 1          | 2019-01-31 | Negative                 |
| Lurasidone            | 2011-06-30 | 2012-06-13 | 2012-09-06 | List with criteria/condition                       | 2013-12-20 | 2012-07-03 |   | 1          |            |                          |
| Lenvatinib            | 2015-01-08 | 2015-12-22 | 2016-03-31 | Reimburse with clinical criteria and/or conditions | 2016-09-20 | 2016-04-18 |   | 1          | 2017-06-16 | Positive                 |
| cemiplimab            | 2018-07-27 | 2019-04-10 | 2019-05-24 | Reimburse with clinical criteria and/or conditions | 2020-01-22 | 2019-07-09 |   | 1          | 2020-11-04 | Positive                 |



|                                |            |            |               |                                                    |            |            |   |                            |                          |
|--------------------------------|------------|------------|---------------|----------------------------------------------------|------------|------------|---|----------------------------|--------------------------|
| Edoxaban                       | 2015-09-03 | 2016-11-04 | 2017-04-25    | Reimburse with clinical criteria and/or conditions | 2017-03-21 | 2016-09-09 | 1 | <a href="#">2019-02-05</a> | Positive                 |
| Colesevelam                    | 2009-10-09 | 2011-09-22 | 2012-02-06    | Do not list at the submitted price                 | 2012-12-19 | 2012-04-27 | 1 | <a href="#">2014-04-16</a> | Positive                 |
| sodium zirconium cyclosilicate | 2018-08-15 | 2019-07-25 | 2019-10-17    | Do not reimburse                                   | 2020-03-25 | 2019-05-17 |   | <a href="#">2020-04-16</a> | Negotiations not pursued |
| Trifluridine, tipiracil        | 2017-05-30 | 2018-01-25 | 2018-03-22    | Do not reimburse                                   | 2018-07-06 | 2017-11-06 | 1 | <a href="#">2019-08-08</a> | Positive                 |
| Lorlatinib                     | 2018-06-26 | 2019-02-22 | 2019-04-22    | Do not reimburse                                   | 2020-01-30 | 2019-06-11 | 1 | <a href="#">2020-04-21</a> | Negotiations not pursued |
| Lutetium (177Lu) oxodotreotide | 2018-06-18 | 2019-01-09 | marketed - no | Reimburse with clinical criteria and/or conditions | 2019-08-01 | 2018-07-30 |   |                            |                          |
| Voretigene neparvovec          | 2019-10-31 | 2020-10-13 |               | Reimburse with clinical criteria and/or conditions | 2020-11-12 | 2020-04-23 |   |                            |                          |
| Olaparib                       | 2015-03-16 | 2016-04-29 | 2016-05-16    | Do not reimburse                                   | 2016-09-29 | 2016-04-01 | 1 | <a href="#">2018-05-15</a> | Positive                 |
| Trientine                      | 2019-08-07 | 2020-09-14 | 2020-11-10    | Reimburse with clinical criteria and/or conditions | 2021-11-11 | 2021-04-19 | 1 |                            | Active negotiation       |
| Pibrentasvir, glecaprevir      | 2017-01-24 | 2017-08-16 | 2017-09-13    | Reimburse with clinical criteria and/or conditions | 2018-01-23 | 2017-06-09 | 1 | <a href="#">2018-12-19</a> | Positive                 |
| siponimod                      | 2018-12-21 | 2020-02-20 | 2020-04-24    | Reimburse with clinical criteria and/or conditions | 2020-07-21 | 2019-09-26 | 1 | <a href="#">2021-10-22</a> | Positive                 |
| Trametinib                     | 2012-08-03 | 2013-07-18 | 2013-08-28    | Reimburse with clinical criteria and/or conditions | 2013-10-22 | 2013-05-06 | 1 | <a href="#">2014-06-25</a> | Positive                 |
| Propiverine                    | 2015-10-23 | 2017-01-05 | 2017-05-08    | Reimburse with clinical criteria and/or conditions | 2017-04-19 | 2016-10-14 | 1 | <a href="#">2018-02-12</a> | Negative                 |
| Mifepristone and Misoprostol   | 2012-11-14 | 2015-07-29 | 2017-01-10    | Reimburse                                          | 2017-04-18 | 2016-10-07 | 1 | <a href="#">2017-07-05</a> | Positive                 |
| Iron isomaltoside 1000         | 2016-04-28 | 2018-06-22 | 2018-10-17    | Reimburse with clinical criteria and/or conditions | 2020-03-25 | 2019-06-26 |   | <a href="#">2021-02-02</a> | Positive                 |
| Plerixafor                     | 2010-12-21 | 2011-12-08 | 2012-03-26    | Do not list                                        | 2012-09-26 | 2012-01-24 | 1 | <a href="#">2014-01-06</a> | Positive                 |
| gemtuzumab oxogamicin          | 2018-12-17 | 2019-11-28 | 2020-03-11    | Reimburse                                          | 2020-04-02 | 2019-08-09 | 1 | <a href="#">2020-08-12</a> | Positive                 |

|                     |            |            |            |                                                    |            |            |   |   |            |                                     |
|---------------------|------------|------------|------------|----------------------------------------------------|------------|------------|---|---|------------|-------------------------------------|
| Mirabegron          | 2012-03-19 | 2013-03-06 | 2013-03-28 | List with criteria/condition                       | 2014-11-12 | 2013-11-27 |   | 1 | 2015-04-08 | Positive                            |
| Galsulfase          | 2012-09-28 | 2013-09-16 | 2014-01-01 | List with clinical criteria and/or conditions      | 2016-02-19 | 2015-08-20 | 1 |   | 2017-01-31 | Negoations not pursued              |
| neratinib maleate   | 2018-07-19 | 2019-07-16 | 2019-12-20 | Do not reimburse                                   | 2019-12-05 | 2019-04-18 |   |   | 2020-02-04 | Negotiations not pursued            |
| Alogliptin          | 2012-08-29 | 2013-11-27 | 2014-04-30 | Do not list                                        | 2015-01-15 | 2014-01-30 |   | 1 | 2015-01-28 | Negotiations not pursued            |
| Rotigotine          | 2011-03-30 | 2013-03-21 | 2013-12-19 | Do not list                                        | 2014-05-28 | 2013-07-31 | 1 |   | 2017-06-23 | Positive                            |
| Ixazomib            | 2015-12-14 | 2016-08-04 | 2016-09-21 | Do not reimburse                                   | 2017-06-29 | 2016-12-16 |   | 1 | 2017-08-18 | Negotiations not pursued            |
| darolutamide        | 2019-03-27 | 2020-02-20 | 2020-03-24 | Reimburse with clinical criteria and/or conditions | 2020-04-22 | 2019-08-27 |   |   | 2021-02-18 | Positive                            |
| Mepolizumab         | 2014-11-19 | 2015-12-03 | 2016-03-14 | Reimburse with clinical criteria and/or conditions | 2016-06-16 |            |   | 1 | 2017-11-24 | Positive                            |
| Obeticholic acid    | 2016-09-16 | 2017-05-24 | 2017-05-26 | Reimburse with clinical criteria and/or conditions | 2017-07-25 | 2016-12-22 | 1 |   | 2018-06-27 | Positive                            |
| Ocrelizumab         | 2016-09-16 | 2017-08-14 | 2017-09-21 | Reimburse with clinical criteria and/or conditions | 2017-11-21 | 2017-05-16 |   | 1 | 2019-02-13 | Positive                            |
| Sonidegib           | 2019-07-04 | 2020-06-12 | 2020-12-23 | Do not reimburse                                   | 2021-04-29 | 2020-06-19 |   | 1 | 2021-06-04 | Negotiations not pursued            |
| Nintedanib          | 2014-07-09 | 2015-06-25 | 2015-06-29 | List with clinical criteria and/or conditions      | 2015-10-15 | 2015-04-23 |   | 1 | 2016-08-29 | Positive                            |
| Baricitinib         | 2016-03-29 | 2018-08-17 | 2018-09-27 | Reimburse with clinical criteria and/or conditions | 2019-08-02 | 2018-12-20 |   | 1 | 2021-05-10 | Positive                            |
| Indacaterol         | 2010-12-22 | 2011-12-06 | 2012-03-05 | List in a similar manner                           | 2012-08-16 | 2012-02-29 |   | 1 | 2013-04-12 | Positive                            |
| patisiran sodium    | 2018-11-14 | 2019-06-07 | 2019-07-25 | Reimburse with clinical criteria and/or conditions | 2019-07-25 | 2019-01-25 | 1 |   | 2020-11-30 | Positive                            |
| safinamide mesylate | 2017-11-08 | 2019-01-10 | 2019-07-08 | Do not reimburse                                   | 2020-03-25 | 2019-05-29 |   | 1 |            | Under consideration for negotiation |

|                       |            |            |            |                                                    |            |            |   |            |            |                                     |
|-----------------------|------------|------------|------------|----------------------------------------------------|------------|------------|---|------------|------------|-------------------------------------|
| Nivolumab             | 2014-12-19 | 2015-09-25 | 2015-10-23 | Reimburse with clinical criteria and/or conditions | 2016-04-01 | 2015-08-13 | 1 | 2017-01-20 | Positive   |                                     |
| Macitentan            | 2012-12-24 | 2013-11-06 | 2014-01-15 | List with clinical criteria and/or conditions      | 2015-01-28 | 2013-12-18 |   | 1          | 2020-12-23 | Positive                            |
| Nitisinone            | 2016-03-30 | 2016-12-13 | 2017-02-17 | Reimburse with clinical criteria and/or conditions | 2018-02-21 | 2017-08-29 | 1 |            | 2018-11-28 | Positive                            |
| Ivacaftor, Lumacaftor | 2015-01-30 | 2016-01-26 | 2016-01-27 | Do not reimburse                                   | 2018-09-26 | 2018-02-22 |   | 1          | 2021-06-03 | Positive                            |
| Apremilast            | 2013-11-08 | 2014-11-12 | 2014-11-27 | Do not list                                        | 2015-07-22 | 2014-10-08 |   | 1          | 2017-09-08 | Negative                            |
| Ozenoxacin            | 2016-04-01 | 2017-05-01 | 2018-01-04 | Do not reimburse                                   | 2018-10-24 | 2018-01-25 |   | 1          | 2018-11-30 | Negotiations not pursued            |
| Semaglutide           | 2017-01-19 | 2018-01-04 | 2018-02-22 | Reimburse with clinical criteria and/or conditions | 2019-05-15 | 2018-11-23 |   | 1          | 2019-07-26 | Positive                            |
| Pertuzumab            | 2012-08-31 | 2013-04-12 | 2013-05-08 | Reimburse with clinical criteria and/or conditions | 2013-08-01 | 2012-11-02 | 1 |            | 2015-07-29 | Negotiations not pursued            |
| Sodium phenylbutyrate | 2014-06-13 | 2015-01-26 | 2015-01-27 | List                                               | 2016-04-15 | 2015-10-20 |   | 1          | 2017-11-20 | Positive                            |
| Ingenol               | 2012-02-09 | 2013-01-30 | 2013-03-21 | Do not list                                        | 2014-01-22 | 2013-05-09 |   | 1          | 2014-12-02 | Negotiations not pursued            |
| Doravirine            | 2017-11-17 | 2018-10-12 | 2018-11-14 | Reimburse with clinical criteria and/or conditions | 2019-05-14 | 2018-11-16 |   | 1          | 2019-10-15 | Positive                            |
| alpelisib             | 2019-04-17 | 2020-03-11 | 2020-06-29 | Do not reimburse                                   | 2022-01-26 | 2021-04-21 |   |            |            | Under consideration for negotiation |
| Peginterferon Beta-1A | 2013-07-31 | 2015-08-10 | 2015-09-29 | List with criteria/condition                       | 2015-12-17 | 2015-06-26 |   |            | 2017-02-14 | Positive                            |
| Polatuzumab vedotinxx | 2019-10-07 | 2020-07-09 | 2020-11-25 | Reimburse with clinical criteria and/or conditions | 2021-04-21 | 2020-09-29 |   | 1          | 2021-12-01 | Positive                            |
| Pomalidomide          | 2013-06-20 | 2014-01-20 | 2014-02-24 | Reimburse with clinical criteria and/or conditions | 2014-07-31 | 2014-01-13 | 1 |            | 2015-01-23 | Positive                            |

|                         |            |            |            |                                                    |            |            |   |   |                            |                                     |
|-------------------------|------------|------------|------------|----------------------------------------------------|------------|------------|---|---|----------------------------|-------------------------------------|
| Alirocumab              | 2015-03-20 | 2016-04-11 | 2016-08-13 | Reimburse with clinical criteria and/or conditions | 2016-07-20 | 2016-01-12 |   | 1 | <a href="#">2018-08-02</a> | Positive                            |
| Letemovir               | 2017-04-10 | 2017-11-01 | 2017-12-20 | Reimburse with clinical criteria and/or conditions | 2018-06-20 | 2017-12-07 |   | 1 | <a href="#">2019-12-18</a> | Positive                            |
| Cysteamine              | 2016-01-21 | 2017-06-13 | 2017-10-17 | Reimburse with clinical criteria and/or conditions | 2018-01-24 | 2017-08-08 | 1 |   | <a href="#">2018-07-20</a> | Positive                            |
| Edaravone               | 2018-03-09 | 2018-10-03 | 2019-10-29 | Reimburse with clinical criteria and/or conditions | 2019-03-27 | 2018-07-05 |   |   | <a href="#">2020-04-15</a> | Positive                            |
| Silodosin               | 2009-12-21 | 2011-01-11 | 2011-10-26 | Do not list                                        | 2012-04-19 | 2011-10-25 |   | 1 |                            |                                     |
| Glycerol Phenylbutyrate | 2014-04-25 | 2016-03-16 | 2016-11-03 | Reimburse with clinical criteria and/or conditions | 2017-03-21 | 2016-08-30 |   |   | <a href="#">2017-12-12</a> | Positive                            |
| Luspatercept            | 2020-03-05 | 2020-09-25 | 2020-11-23 | Reimburse with clinical criteria and/or conditions | 2021-06-08 | 2020-11-26 |   |   |                            | Under consideration for negotiation |
| Evolocumab              | 2014-09-25 | 2015-09-10 | 2015-09-28 | List with clinical criteria and/or conditions      | 2016-02-19 | 2015-06-30 |   | 1 | <a href="#">2017-10-23</a> | Positive                            |
| Prucalopride            | 2010-12-17 | 2011-12-07 | 2012-01-12 | Do not list                                        | 2012-07-19 | 2012-01-30 |   | 1 |                            |                                     |
| Teduglutide             | 2014-12-01 | 2015-09-04 | 2015-10-28 | Reimburse with clinical criteria and/or conditions | 2016-07-27 | 2015-11-26 |   | 1 | <a href="#">2018-08-07</a> | Positive                            |
| Eltrombopag             | 2008-12-08 | 2011-01-12 | 2011-04-04 | Do not list                                        | 2011-10-24 | 2011-04-26 |   | 1 | <a href="#">2015-05-28</a> | Negotiations not pursued            |
| Brexipiprazole          | 2016-02-26 | 2017-02-16 | 2017-04-19 | Reimburse with clinical criteria and/or conditions | 2017-11-22 | 2017-02-03 |   | 1 | <a href="#">2018-12-14</a> | Positive                            |
| upadacitinib            | 2019-01-16 | 2019-12-23 | 2020-01-16 | Reimburse with clinical criteria and/or conditions | 2020-02-04 | 2019-07-04 |   | 1 |                            | Active negotiation                  |
| Ivermectin              | 2014-05-06 | 2015-04-22 | 2015-05-25 | List with criteria/condition                       | 2015-11-19 | 2015-04-30 |   | 1 | <a href="#">2016-08-26</a> | Negative                            |
| entrectinib             | 2019-05-08 | 2020-02-10 | 2020-03-10 | Reimburse with clinical criteria and/or conditions | 2021-01-27 | 2020-01-08 |   |   | <a href="#">2021-07-06</a> | Positive                            |

|                                                   |            |            |            |                                                    |            |            |   |   |            |                                     |
|---------------------------------------------------|------------|------------|------------|----------------------------------------------------|------------|------------|---|---|------------|-------------------------------------|
| Amifampridine                                     | 2019-12-20 | 2020-08-10 | 2020-09-24 | Reimburse with clinical criteria and/or conditions | 2021-04-20 | 2020-10-05 |   |   |            | Active negotiation                  |
| Midostaurin                                       | 2016-12-09 | 2017-07-21 |            | Reimburse                                          | 2017-12-19 | 2017-06-12 | 1 |   |            |                                     |
| Tolvaptan                                         | 2010-08-18 | 2011-07-25 | 2011-09-22 | Do not list                                        | 2013-02-13 | 2012-07-03 |   | 1 | 2014-01-31 | Negotiations not pursued            |
| Asenapine                                         | 2009-11-12 | 2011-10-07 | 2011-12-19 | List with clinical criteria and/or conditions      | 2012-06-14 | 2011-12-12 |   | 1 |            |                                     |
| Isatuximab                                        | 2019-06-28 | 2020-04-29 | 2020-07-03 | Reimburse with clinical criteria and/or conditions | 2021-04-01 | 2020-08-17 |   | 1 |            | Under consideration for negotiation |
| Pasireotide                                       | 2011-02-08 | 2013-09-23 | 2013-11-26 | Do not list                                        | 2015-02-24 | 2014-02-27 | 1 |   | 2015-04-30 | Negotiations not pursued            |
| Brodalumab                                        | 2016-05-24 | 2018-03-06 | 2018-07-05 | Reimburse with clinical criteria and/or conditions | 2018-06-20 |            |   |   | 2018-12-14 | Positive                            |
| risankizumab                                      | 2018-05-07 | 2019-04-17 | 2019-05-13 | Reimburse with clinical criteria and/or conditions | 2019-05-28 | 2018-10-22 |   | 1 | 2019-11-28 | Positive                            |
| Sofosbuvir                                        | 2013-05-21 | 2013-12-13 | 2014-01-06 | List with criteria/condition                       | 2014-08-18 | 2013-10-01 | 1 |   | 2015-02-05 | Positive                            |
| Nusinersen                                        | 2016-11-10 | 2017-06-29 | 2017-08-29 | Reimburse with clinical criteria and/or conditions | 2017-12-22 | 2017-06-28 |   |   | 2018-09-26 | Positive                            |
| Ertugliflozin                                     | 2017-04-13 | 2018-05-09 | 2018-05-28 | Do not reimburse                                   | 2019-01-23 | 2018-04-30 |   | 1 | 2020-03-31 | Negative                            |
| Regorafenib                                       | 2012-08-15 | 2013-03-11 | 2013-04-02 | Do not reimburse                                   | 2013-11-15 | 2013-03-22 |   | 1 | 2014-08-11 | Positive                            |
| Asfotase Alfa                                     | 2014-11-14 | 2015-08-14 | 2015-10-20 | List with criteria/condition                       | 2016-03-23 | 2015-08-21 | 1 |   | 2018-01-09 | Positive                            |
| Elvitgravir, Emtricitabine, Tenofovir, Cobicistat | 2011-12-19 | 2012-11-26 | 2012-12-20 | List with criteria/condition                       | 2013-05-15 | 2012-11-30 |   | 1 | 2013-07-11 | Positive                            |
| Asunaprevir                                       | 2014-05-16 | 2016-03-09 | 2016-04-22 | Reimburse with clinical criteria and/or conditions | 2016-07-20 | 13-Feb-15  |   | 1 | 2017-02-17 | Positive                            |
| Siltuximab                                        | 2014-04-28 | 2014-12-03 | 2015-03-03 | Reimburse with clinical criteria and/or conditions | 2015-06-22 | 2015-01-30 |   | 1 | 2013-08-14 | Positive                            |

|                              |            |            |            |                                                    |            |            |   |                            |          |
|------------------------------|------------|------------|------------|----------------------------------------------------|------------|------------|---|----------------------------|----------|
| Dabrafenib                   | 2012-07-31 | 2013-07-16 | 2013-08-28 | Reimburse with clinical criteria and/or conditions | 2013-12-05 | 2013-03-18 | 1 | <a href="#">2014-06-25</a> | Positive |
| Osimertinib                  | 2015-10-01 | 2016-07-05 | 2016-07-19 | Reimburse with clinical criteria and/or conditions | 2017-05-04 | 2016-04-01 | 1 | <a href="#">2018-07-30</a> | Positive |
| Lanadelumab                  | 2018-02-22 | 2018-09-19 | 2018-10-31 | Reimburse with clinical criteria and/or conditions | 2019-11-19 | 2019-05-29 | 1 | <a href="#">2020-10-30</a> | Positive |
| Ixekizumab                   | 2015-06-05 | 2016-05-25 | 2016-08-11 | Reimburse with clinical criteria and/or conditions | 2016-10-25 | 2016-03-23 | 1 | <a href="#">2017-12-29</a> | Positive |
| Atezolizumab                 | 2016-07-18 | 2017-04-12 | 2017-05-02 | Reimburse with clinical criteria and/or conditions | 2018-06-20 | 2017-12-15 | 1 | <a href="#">2018-11-29</a> | Positive |
| Dimethyl fumarate            | 2012-04-16 | 2013-04-03 | 2013-04-12 | List with criteria/condition                       | 2013-09-25 | 2013-02-04 | 1 | <a href="#">2014-04-10</a> | Positive |
| Inotersen sodium             | 2018-03-17 | 2018-10-03 | 2019-01-07 | Reimburse with clinical criteria and/or conditions | 2019-12-18 | 2019-02-22 |   | <a href="#">2020-04-30</a> | Positive |
| Dolutegravir                 | 2012-12-17 | 2013-10-31 | 2013-11-08 | List                                               | 2014-08-18 | 2013-10-18 | 1 | <a href="#">2015-04-08</a> | Positive |
| Fesoterodine                 | 2011-03-01 | 2012-02-09 | 2012-04-19 | List in a similar manner                           | 2012-10-18 | 2012-04-27 | 1 |                            |          |
| Linagliptin                  | 2010-08-17 | 2011-07-28 | 2011-09-13 | List with clinical criteria and/or conditions      | 2012-02-15 | 2011-08-23 | 1 |                            |          |
| Bendamustine                 | 2011-09-08 | 2012-08-24 | 2012-09-12 | Reimburse                                          | 2012-11-29 | 2012-04-24 | 1 | <a href="#">2013-04-25</a> | Positive |
| Guselkumab                   | 2016-12-25 | 2017-11-10 | 2017-11-27 | Reimburse with clinical criteria and/or conditions | 2018-02-21 | 2017-08-25 | 1 | <a href="#">2019-06-21</a> | Negative |
| Flextouch (insulin degludec) | 2016-09-13 | 2017-08-25 | 2017-09-15 | Reimburse with clinical criteria and/or conditions | 2017-11-20 | 2017-05-31 | 1 | <a href="#">2018-07-26</a> | Positive |
| Dulaglutide                  | 2014-02-10 | 2015-11-10 | 2016-01-08 | Reimburse with clinical criteria and/or conditions | 2016-06-16 | 2015-12-22 | 1 | <a href="#">2019-09-27</a> | Negative |
| Acidinium                    | 2012-07-31 | 2013-07-29 | 2013-09-13 | List with criteria/condition                       | 2014-04-21 | 2013-08-21 | 1 | <a href="#">2014-07-16</a> | Positive |

|                                     |                          |                          |                          |                                                              |                          |                          |   |            |                                     |
|-------------------------------------|--------------------------|--------------------------|--------------------------|--------------------------------------------------------------|--------------------------|--------------------------|---|------------|-------------------------------------|
| Tucatinib                           | 2020-01-20               | 2020-06-05               | 2020-10-08               | Reimburse with clinical criteria and/or conditions           | 2021-11-17               | 2021-03-26               |   |            | Under consideration for negotiation |
| Dinutuximab                         | 2017-12-14               | 2018-11-28               | 2019-05-01               | Reimburse with clinical criteria and/or conditions           | 2019-03-26               | 2018-10-01               |   | 2019-08-30 | Positive                            |
| Selexipag                           | 2015-02-13               | 2016-01-20               | 2016-04-21               | Reimburse with clinical criteria and/or conditions           | 2016-10-28               | 2016-03-31               | 1 | 2017-12-12 | Positive                            |
| icosapent ethyl                     | 2019-04-29               | 2019-12-30               | 2020-02-07               | Reimburse with clinical criteria and/or conditions           | 2020-07-16               | 2019-06-17               | 1 |            | Active negotiation                  |
| Sucroferric oxyhydroxide            | 2016-12-22               | 2018-01-05               | 2019-11-20               | Reimburse with clinical criteria and/or conditions           | 2019-01-02               | 2018-06-12               |   | 2019-09-17 | Positive                            |
| Patiromer sorbitex calcium          | 2017-10-20               | 2018-10-03               | 2020-03-09               | Reimburse with clinical criteria and/or conditions           | 2021-06-08               | 2020-10-30               |   | 2022-02-18 | Negative                            |
| Abemaciclib+A3:M 331                | 2018-04-16               | 2019-04-05               | 2019-07-03               | Reimburse with clinical criteria and/or conditions           | 2019-07-05               |                          | 1 | 2020-04-09 | Negative                            |
| Eluxadoline                         | 2015-12-11               | 2017-01-26               | 2017-04-24               | Do not reimburse                                             | 2018-08-24               | 2018-02-23               | 1 | 2018-11-07 | Negotiations not pursued            |
| Boceprevir                          | 2010-12-22               | 2011-07-29               | 2011-08-02               | List with clinical criteria and/or conditions                | 2011-10-24               | 2011-05-03               | 1 |            |                                     |
| Elosulfase Alfa Dienogest           | 2013-11-26<br>2009-08-21 | 2014-07-02<br>2011-10-12 | 2014-08-27<br>2011-10-25 | Do not list<br>List with clinical criteria and/or conditions | 2015-03-25<br>2012-04-19 | 2014-08-05<br>2011-10-18 |   | 2018-11-29 | Positive                            |
| larotrectinib                       | 2018-09-18               | 2019-07-10               | 2020-11-13               | Do not reimburse                                             | 2019-10-31               | 2019-02-25               | 1 | 2019-12-30 | Negotiations not pursued            |
| Dacomitinib monohydrate             | 2018-03-16               | 2019-02-26               | 2019-04-22               | Reimburse with clinical criteria and/or conditions           | 2019-05-31               | 2018-09-19               |   | 2020-02-11 | Negative                            |
| von Willebrand factor (recombinant) | 2018-01-26               | 2019-01-10               |                          | Reimburse with clinical criteria and/or conditions           | 2021-03-17               | 2020-04-29               |   |            |                                     |

|                                       |            |            |            |                                                    |            |            |   |            |                          |
|---------------------------------------|------------|------------|------------|----------------------------------------------------|------------|------------|---|------------|--------------------------|
| Sofosbuvir, velpatasvir, voxilaprevir | 2017-01-27 | 2017-08-16 | 2017-09-18 | Reimburse with clinical criteria and/or conditions | 2018-01-23 | 2017-07-28 | 1 | 2018-02-14 | Positive                 |
| tafamidis meglumine                   | 2019-06-03 | 2020-01-20 | 2020-04-07 | Reimburse with clinical criteria and/or conditions | 2020-02-19 | 2019-07-04 | 1 | 2021-02-04 | Positive                 |
| Latanoprostene Bunod                  | 2018-01-24 | 2018-12-27 | 2019-05-17 | Reimburse with clinical criteria and/or conditions | 2019-07-24 | 2018-11-23 | 1 | 2019-11-20 | Positive                 |
| Crizotinib                            | 2011-06-08 | 2012-04-12 | 2012-05-10 | Do not reimburse                                   | 2012-10-04 | 2012-03-26 | 1 | 2013-08-08 | Positive                 |
| Tofacitinib                           | 2012-04-03 | 2014-04-17 | 2014-06-03 | List with criteria/condition                       | 2015-04-17 | 2014-05-05 | 1 | 2016-04-26 | Positive                 |
| Telotristat etiprate                  | 2017-11-01 | 2018-10-10 | 2018-12-07 | Do not reimburse                                   | 2019-06-26 | 2018-09-27 | 1 | 2019-07-12 | Negotiations not pursued |
| Collagenase clostridium histolyticum  | 2011-06-07 | 2012-07-05 | 2012-11-14 | List with criteria/condition                       | 2013-03-27 | 2012-08-30 | 1 | 2014-03-18 | Negotiations not pursued |
| gilteritinib fumarate                 | 2019-05-22 | 2019-12-23 | 2020-02-03 | Reimburse with clinical criteria and/or conditions | 2020-05-20 | 2019-10-28 | 1 | 2021-03-15 | Positive                 |
| Enzalutamide                          | 2012-10-26 | 2013-05-29 | 2013-06-07 | Reimburse with clinical criteria and/or conditions | 2013-07-23 | 2013-03-04 | 1 | 2013-09-23 | Positive                 |
| Ipilimumab                            | 2010-10-13 | 2012-02-01 | 2012-03-08 | Reimburse with clinical criteria and/or conditions | 2012-04-18 | 2011-12-01 | 1 | 2012-08-28 | Positive                 |
| Aflibercept                           | 2012-05-09 | 2014-02-12 | 2014-05-08 | Do not reimburse                                   | 2014-09-05 | 2013-11-26 | 1 | 2014-09-25 | Negotiations not pursued |
| Rifaximin                             | 2013-01-14 | 2013-08-13 | 2013-11-07 | List with criteria/condition                       | 2015-04-16 | 2014-08-05 | 1 | 2016-03-02 | Positive                 |
| niraparib                             | 2018-06-04 | 2019-06-27 | 2020-01-09 | Reimburse with clinical criteria and/or conditions | 2020-09-03 | 2020-02-07 | 1 | 2021-08-11 | Positive                 |
| Vemurafenib                           | 2011-07-18 | 2012-02-15 | 2012-03-05 | Reimburse with clinical criteria and/or conditions | 2012-06-01 | 2011-12-06 | 1 |            |                          |
| Elbasvir, Grazoprevir                 | 2015-06-30 | 2016-01-19 | 2016-01-25 | Reimburse with clinical criteria and/or conditions | 2016-05-19 | 2015-10-27 | 1 | 2017-02-17 | Positive                 |
| Ozanimod                              | 2019-10-25 | 2020-10-02 | 2020-11-12 | Do not reimburse                                   | 2021-06-23 | 2020-08-25 |   | 2021-07-29 | Negotiations not pursued |



|                                                            |            |            |            |                                                    |            |            |  |   |                            |                          |
|------------------------------------------------------------|------------|------------|------------|----------------------------------------------------|------------|------------|--|---|----------------------------|--------------------------|
| Daclizumab beta                                            | 2015-12-21 | 2016-12-08 | 2017-03-30 | List with clinical criteria and/or conditions      | 2017-06-20 | 2016-12-20 |  | 1 | <a href="#">2018-03-29</a> | Negotiations not pursued |
| Onasemnogene abeparovvec                                   | 2020-05-21 | 2020-12-15 | 2021-02-04 | Reimburse with clinical criteria and/or conditions | 2021-03-24 | 2020-06-25 |  |   | <a href="#">2021-10-08</a> | Positive                 |
| Idelalisib                                                 | 2014-02-28 | 2015-03-27 | 2015-04-21 | Reimburse with clinical criteria and/or conditions | 2015-08-18 | 2015-04-07 |  | 1 | <a href="#">2016-06-03</a> | Positive                 |
| Ceritinib                                                  | 2014-06-16 | 2015-03-27 | 2015-04-29 | Do not reimburse                                   | 2015-12-03 | 2015-06-05 |  | 1 | <a href="#">2018-03-20</a> | Positive                 |
| Abiraterone                                                | 2010-12-23 | 2011-07-27 | 2011-07-28 | Reimburse with clinical criteria and/or conditions | 2013-10-22 |            |  | 1 | <a href="#">2014-01-23</a> | Positive                 |
| Boceprevir, perinterferon alfa-2b, ribavirin               | 2011-01-05 | 2011-08-10 | 2011-08-16 |                                                    |            |            |  | 1 |                            |                          |
| Cabazitaxel                                                | 2010-07-02 | 2011-06-16 | 2011-08-23 |                                                    |            |            |  | 1 |                            |                          |
| Ferumoxytol                                                | 2009-12-18 | 2011-12-08 | 2012-05-01 |                                                    |            |            |  |   |                            |                          |
| Catridecacog                                               | 2011-12-20 | 2012-07-19 | 2013-01-30 |                                                    |            |            |  | 1 |                            |                          |
| Meningococcal polysaccharide conjugate vaccine             | 2012-03-21 | 2013-03-05 | 2013-08-22 |                                                    |            |            |  | 1 |                            |                          |
| Diffuprednate                                              | 2012-11-20 | 2013-11-04 | 2014-02-19 |                                                    |            |            |  |   |                            |                          |
| Multicomponent meningococcal B vaccine                     | 2011-05-26 | 2013-12-06 | 2014-02-26 |                                                    |            |            |  | 1 |                            |                          |
| Canagliflozin                                              | 2012-07-27 | 2014-05-23 | 2014-06-03 | Withdrawn                                          |            | 2013-05-05 |  |   |                            | 1                        |
| Vortioxetine                                               | 2012-09-28 | 2014-10-22 | 2014-10-28 | Withdrawn                                          |            | 2014-10-31 |  |   |                            | 1                        |
| Human papillomavirus 9 valent vaccine, recombinant         | 2014-02-13 | 2015-02-05 | 2015-03-18 |                                                    |            |            |  | 1 |                            |                          |
| Naloxegol                                                  | 2013-08-30 | 2015-06-02 | 2015-08-27 |                                                    |            |            |  |   |                            | 1                        |
| Carglumic Acid                                             | 2014-01-14 | 2015-04-10 | 2015-09-08 |                                                    |            |            |  | 1 |                            |                          |
| Bromfenac                                                  | 2014-04-04 | 2015-03-26 | 2015-09-25 |                                                    |            |            |  |   |                            |                          |
| Levomilnacipran                                            | 2013-08-13 | 2015-05-08 | 2015-11-19 |                                                    |            |            |  |   |                            | 1                        |
| Recombinant human coagulation Factor IX, FC fusion protein | 2013-03-28 | 2014-03-20 | 2015-12-11 |                                                    |            |            |  |   |                            | 1                        |

|                                                      |            |            |            |                                                                                              |            |   |   |
|------------------------------------------------------|------------|------------|------------|----------------------------------------------------------------------------------------------|------------|---|---|
| Simoctocog alfa                                      | 2013-11-01 | 2014-10-23 | 2015-12-22 |                                                                                              |            |   | 1 |
| Ceftolozane Sulfate and Tazobactam Sodium            | 2014-09-15 | 2015-09-30 | 2016-01-12 |                                                                                              |            |   | 1 |
| Antihemophilic factor, FC fusion protein             | 2013-07-30 | 2014-08-22 | 2016-01-15 |                                                                                              |            |   |   |
| Sugammadex                                           | 2014-12-23 | 2016-02-05 | 2016-02-19 |                                                                                              |            | 1 |   |
| Palbociclib                                          | 2015-02-12 | 2016-03-16 | 2016-04-20 | Withdrawn                                                                                    | 2015-11-11 |   | 1 |
| Idarucizumab                                         | 2015-03-04 | 2016-04-29 | 2016-05-24 | Withdrawn                                                                                    |            |   | 1 |
| Venetoclax                                           | 2015-12-21 | 2016-09-30 | 2016-10-31 | Withdrawn                                                                                    | 2016-07-08 |   | 1 |
| Polidocanol                                          | 2014-08-20 | 2015-08-04 | 2016-11-30 |                                                                                              |            |   |   |
| Antihemophilic Factor (Recombinant) Porcine Sequence | 2014-08-15 | 2015-10-14 | 2016-11-30 |                                                                                              |            |   |   |
| Bilastine                                            | 2015-05-11 | 2016-04-21 | 2016-12-02 |                                                                                              |            |   | 1 |
| Conjugated estrogens and bazedoxifene acetate        | 2012-12-04 | 2014-10-23 | 2016-12-20 |                                                                                              |            |   | 1 |
| Rupatadine                                           | 2015-08-04 | 2016-07-20 | 2017-01-16 |                                                                                              |            |   |   |
| Bepotastine                                          | 2015-08-19 | 2016-07-27 | 2017-03-23 |                                                                                              |            |   | 1 |
| Defibrotide                                          | 2016-12-09 | 2017-07-10 | 2017-09-06 |                                                                                              |            |   | 1 |
| Gadoterate Meglumine                                 | 2015-07-31 | 2016-11-25 | 2017-09-22 |                                                                                              |            |   |   |
| Varicella-zoster virus glycoprotein E                | 2016-11-17 | 2017-10-13 | 2018-01-02 |                                                                                              |            | 1 |   |
| Vernakalant                                          | 2016-01-04 | 2017-03-13 | 2018-01-23 |                                                                                              |            |   | 1 |
| Vilazodone                                           | 2014-07-29 | 2015-07-16 | 2018-01-31 | CADTH is unable to recommend reimbursement as a submission was not filed by the manufacturer |            |   |   |

|                                                                                                                                  |            |            |            |                                                                                              |            |   |
|----------------------------------------------------------------------------------------------------------------------------------|------------|------------|------------|----------------------------------------------------------------------------------------------|------------|---|
| Neisseria meningitidis GRP B recombinant lipoprotein 2086 subfamily A, neisseria meningitidis GRP B recbominant 2086 subfamily B | 2016-05-31 | 2017-10-05 | 2018-01-31 |                                                                                              |            | 1 |
| Lifitegrast                                                                                                                      | 2016-10-28 | 2017-12-22 | 2018-02-12 |                                                                                              |            |   |
| Antihemophilic Factor (Recombinant), PEGylated                                                                                   | 2015-12-02 | 2016-11-17 | 2018-03-06 |                                                                                              |            |   |
| Turoctocog alfa                                                                                                                  | 2013-12-16 | 2014-12-08 | 2018-03-23 |                                                                                              |            | 1 |
| Coagulation factor IX (recombinant) pegylated                                                                                    | 2016-12-12 | 2017-11-29 | 2018-03-23 |                                                                                              |            | 1 |
| Follitropin delta                                                                                                                | 2015-12-09 | 2018-03-22 | 2018-05-23 |                                                                                              |            | 1 |
| Tezacaftor, Ivacaftor                                                                                                            | 2017-11-17 | 2018-06-27 | 2018-06-28 | CADTH is unable to recommend reimbursement as a submission was not filed by the manufacturer |            | 1 |
| Cabozantinib                                                                                                                     | 2017-06-06 | 2018-09-14 | 2018-10-10 | Withdrawn                                                                                    | 2017-10-06 | 1 |
| Elagolix sodium                                                                                                                  | 2017-09-22 | 2018-10-05 | 2018-10-30 | CADTH is unable to recommend reimbursement as a submission was not filed by the              |            | 1 |
| Flibanserin                                                                                                                      | 2015-11-18 | 2018-02-27 | 2018-11-13 |                                                                                              |            |   |
| Panhematin                                                                                                                       | 2017-12-20 | 2018-07-13 | 2018-12-05 |                                                                                              |            |   |
| Suvorexant                                                                                                                       | 2016-07-05 | 2018-11-29 | 2019-04-18 |                                                                                              |            | 1 |
| Tisagenlecleucel                                                                                                                 | 2018-02-09 | 2018-09-05 | 2019-05-24 |                                                                                              |            | 1 |
| Albutrepenonacog Alfa                                                                                                            | 2015-02-09 | 2016-01-26 | 2019-07-04 |                                                                                              |            |   |

|                                                                  |            |            |                    |                                                                                              |  |            |   |
|------------------------------------------------------------------|------------|------------|--------------------|----------------------------------------------------------------------------------------------|--|------------|---|
| galcanezumab                                                     | 2018-08-21 | 2019-07-30 | 2019-10-07         | CADTH is unable to recommend reimbursement as a submission was not filed by the manufacturer |  |            | 1 |
| Axicabtagene ciloleucel                                          | 2018-07-23 | 2019-02-13 | 2019-11-27         |                                                                                              |  |            | 1 |
| trifarotene                                                      | 2018-12-14 | 2019-11-25 | 2019-11-28         |                                                                                              |  |            | 1 |
| erdafitinib                                                      | 2019-02-08 | 2019-10-25 | 2019-12-09         |                                                                                              |  |            |   |
| Antihemophilic factor (recombinant, B-domain deleted, PEGylated) | 2017-11-03 | 2018-10-18 | 2020-04-08         |                                                                                              |  |            |   |
| tibolone                                                         | 2017-06-01 | 2019-05-10 | 2020-07-29         |                                                                                              |  |            | 1 |
| Etomidate                                                        | 2019-08-30 | 2020-07-15 | 2020-09-14         |                                                                                              |  |            |   |
| cabotegravir sodium                                              | 2019-04-29 | 2020-03-18 | 2020-09-21         |                                                                                              |  |            |   |
| Remdesivir                                                       | 2020-06-19 | 2020-07-27 | 2020-10-16         |                                                                                              |  |            |   |
| Amifampridine                                                    | 2019-11-06 | 2020-07-31 | 2020-10-23         | Active                                                                                       |  | 2021-11-15 |   |
| Lemborexant                                                      | 2019-09-03 | 2020-11-04 | 2020-11-06         | Pending                                                                                      |  |            |   |
| Cedazuridine, Decitabine                                         | 2019-12-31 | 2020-07-07 | 2020-11-11         | Active                                                                                       |  | 2020-10-09 |   |
| Tenapanor                                                        | 2019-02-26 | 2020-04-15 | 2020-11-23         |                                                                                              |  |            |   |
| Givosiran                                                        | 2020-03-19 | 2020-10-09 | 2020-12-01         | Reimburse with clinical criteria and/or conditions                                           |  | 2021-02-23 | 1 |
| Ripretinib                                                       | 2019-12-23 | 2020-06-19 | 2020-12-10         | Active                                                                                       |  |            |   |
| Fostamatinib                                                     | 2019-09-30 | 2020-11-19 | 2020-12-10         | Active                                                                                       |  | 2021-07-22 |   |
| Decitabine                                                       | 2017-12-28 | 2019-01-21 | 2021-03-24         | CADTH is unable to recommend reimbursement as a submission was not filed by the manufacturer |  |            |   |
| Dalbavancin                                                      | 2017-12-21 | 2018-09-04 | 2021-05-28         |                                                                                              |  |            | 1 |
| ravulizumab                                                      | 2018-09-13 | 2019-08-28 | 2021-09-09         | Withdrawn                                                                                    |  | 2019-07-04 |   |
| plecanatide                                                      | 2018-09-20 | 2019-10-10 | 2022-01-12         |                                                                                              |  |            |   |
| Rubidium chloride                                                | 2010-05-17 | 2011-09-20 | marketed - no date |                                                                                              |  |            |   |

|                                                     |            |            |                              |            |   |
|-----------------------------------------------------|------------|------------|------------------------------|------------|---|
| Radium-223 dichloride                               | 2012-12-21 | 2013-12-12 | marketed - no date           |            | 1 |
| Florbetaben 18F Ioflupane                           | 2016-02-26 | 2017-02-22 | marketed - no date           |            |   |
| oxodotreotide                                       | 2016-12-22 | 2017-12-07 | marketed - no date           |            |   |
| gallium (68ga) chloride                             | 2018-07-20 | 2019-07-03 | marketed - no date           |            | 1 |
|                                                     | 2018-12-05 | 2019-11-13 | marketed - no date           |            |   |
| Albiglutide                                         | 2013-05-24 | 2015-07-15 | NOC cancelled pre-market     |            |   |
| Lubiprostone                                        | 2014-10-31 | 2015-10-14 | NOC cancelled pre-market     |            |   |
| Necitumumab                                         | 2016-03-29 | 2017-03-16 | NOC cancelled pre-market     |            |   |
| Ezogabine                                           | 2011-10-31 | 2012-10-08 | not in Drug Product Database |            |   |
| Botulinum antitoxin serotypes A, B,C, D, E, F and G | 2015-12-22 | 2016-12-08 | restricted access            |            |   |
| Anthrax immune globuline                            | 2016-11-24 | 2017-11-06 | restricted access            |            |   |
| Anthrax antigen filtrate                            | 2017-12-29 | 2018-12-13 | restricted access            |            |   |
| Clevidipine                                         | 2008-10-07 | 2011-04-15 |                              |            |   |
| Remestemcel-L                                       | 2011-09-15 | 2012-05-17 |                              |            |   |
| Haemagglutinin-Strain A                             | 2007-07-05 | 2013-02-13 |                              |            |   |
| Olodaterol                                          | 2012-06-28 | 2013-06-11 |                              |            |   |
| Tafluprost                                          | 2013-06-10 | 2014-05-26 |                              |            |   |
| Tedizolid                                           | 2014-04-01 | 2015-03-17 | Withdrawn                    | 2015-01-16 | 1 |
| Finaxofloxacin                                      | 2014-06-05 | 2016-03-11 |                              |            |   |
| Vorapaxar                                           | 2014-10-31 | 2016-05-13 |                              |            |   |
| Elotuzumab                                          | 2015-10-01 | 2016-06-21 |                              |            | 1 |
| Lonococog Alfa                                      | 2015-12-23 | 2016-12-12 |                              |            |   |
| Peramivir                                           | 2016-01-25 | 2017-01-05 |                              |            |   |
| Calcifediol                                         | 2017-05-09 | 2018-07-10 |                              |            |   |
| Cenegermi                                           | 2018-07-16 | 2019-02-08 | Active                       | 2021-10-29 | 1 |
| antihemophilic factor viii pegylated decitabine     | 2018-07-23 | 2019-07-04 |                              |            |   |
|                                                     | 2018-06-29 | 2019-07-11 |                              |            |   |

|                         |            |            |                                                                                              |            |   |
|-------------------------|------------|------------|----------------------------------------------------------------------------------------------|------------|---|
| talazoparib             | 2018-09-28 | 2019-09-06 | CADTH is unable to recommend reimbursement as a submission was not filed                     |            |   |
| prasterone              | 2016-10-05 | 2019-11-01 | Active                                                                                       | 2021-10-01 | 1 |
| baloxavir marboxil      | 2019-04-30 | 2020-02-19 | CADTH is unable to recommend reimbursement as a submission was not filed by the manufacturer |            |   |
| Lefamulin               | 2019-11-07 | 2020-07-10 |                                                                                              |            |   |
| Obiltoxaximab           | 2019-08-16 | 2020-07-30 |                                                                                              |            |   |
| Gallium (68ga) chloride | 2019-05-15 | 2020-08-19 |                                                                                              |            |   |
